# Supplementary material
Source: Springer Nature journal article supplement (https://www.springermedizin.de/resource/supplementary/12879_2012_2121_MOESM1_ESM.pdf/9443682)
Supplement: MOESM1 [file 9443682]

Identified through comprehensive search  
N = 5572 records

Titles and abstracts screened  
N = 5572

Clearly irrelevant records excluded  
N = 5550

Full-text articles reviewed for eligibility  
N = 22

Excluded studies: 7 studies

- Study with non-HIV outcomes(N=6)
- Study which enrolled only HIV positive women (N=1)

Ongoing studies:  
N = 2

Studies included in review  
N = 13
